# Supplementary material for: A Versatile Transcription Factor Biosensor System Responsive to Multiple Aromatic and Indole Inducers
Source: PubMed Central journal article supplement — ACS Synth Biol. 2022 Mar 22;11(4):1692–8. doi: 10.1021/acssynbio.2c00063 (PMC9017570; doi:10.1021/acssynbio.2c00063), 2022-03-22
Supplement: sb2c00063_si_001.pdf [file sb2c00063_si_001.pdf]

1 **Supporting Information**

2  
3 **A Versatile Transcription Factor Biosensor System Responsive to Multiple**  
4 **Aromatic and Indole Inducers**

5  
6  
7  
8 Mohamed A. Nasr <sup>a,b</sup>, Logan R. Timmins <sup>a,b,c</sup>, Vincent J.J Martin <sup>a,\*</sup>, David H. Kwan<sup>a,b,d,\*</sup>

9  
10 <sup>a</sup> Department of Biology, Centre for Applied Synthetic Biology, and Centre for Structural and  
11 Functional Genomics, Concordia University, Montréal, QC H4B 1R6, Canada

12 <sup>b</sup> PROTEO, Quebec Network for Research on Protein Function, Structure, and Engineering,  
13 Québec City, QC G1V 0A6, Canada

14 <sup>c</sup> Current address: Life Sciences Institute, Department of Biomedical Engineering, University of  
15 British Columbia, Vancouver, BC, V6T 1Z3, Canada

16 <sup>d</sup> Department of Chemistry and Biochemistry, Concordia University, Montréal, QC H4B 1R6,  
17 Canada

18 \* Corresponding authors

19

20

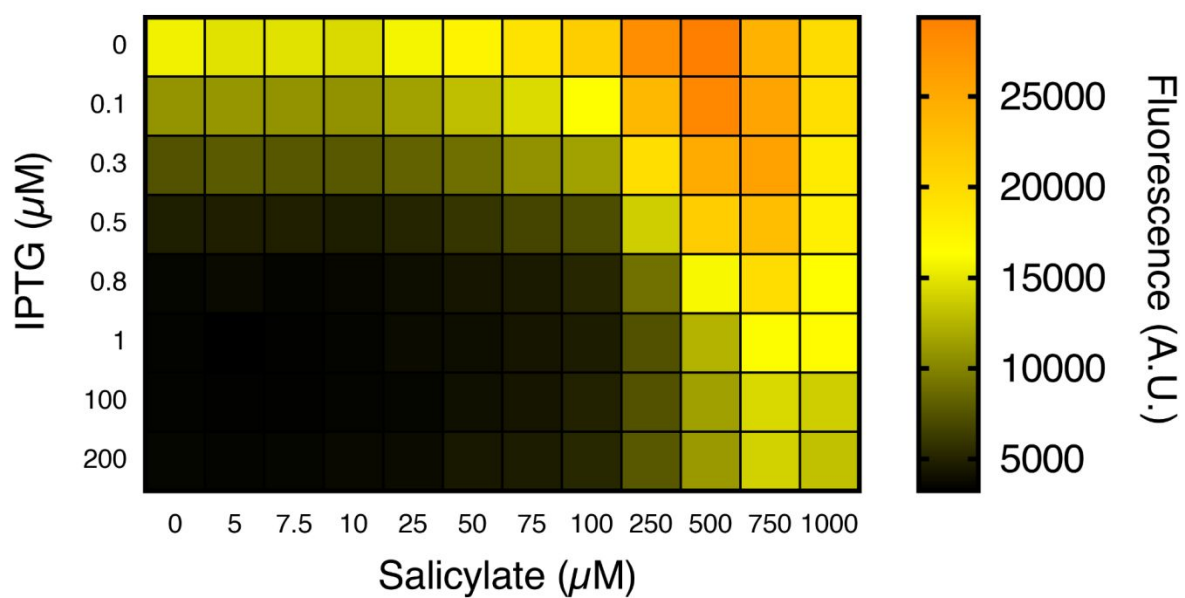

21

22 **Supplementary Figure 1:** Tunable promoter output by measuring whole-cell GFP fluorescence using a  
 23 plate reader at varying concentrations of IPTG (0-200  $\mu\text{M}$ ) and salicylate (0-1000  $\mu\text{M}$ ).

24

25

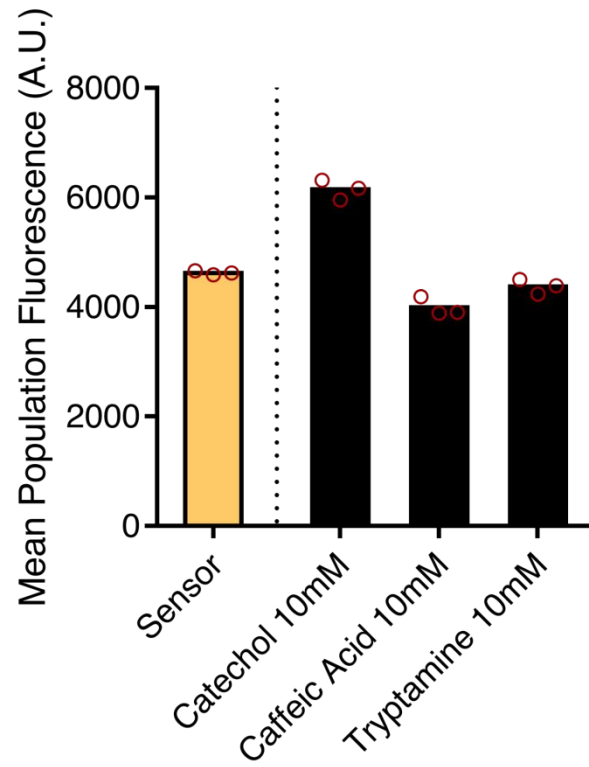

26

27 **Supplementary Figure 2:** Fluorescence measurements of the sensor strain exposed to 10 mM each of  
28 catechol, caffeic acid, and tryptamine.

29

30

31 **Supplementary table 1:**

**Gene(s):**

|                                                                   |                                                                                                                                                                                                                                                                                                                                                                                                                                                                                                                                                                                                                                                                                                                                            |
|-------------------------------------------------------------------|--------------------------------------------------------------------------------------------------------------------------------------------------------------------------------------------------------------------------------------------------------------------------------------------------------------------------------------------------------------------------------------------------------------------------------------------------------------------------------------------------------------------------------------------------------------------------------------------------------------------------------------------------------------------------------------------------------------------------------------------|
| <i>cmeR</i> (codon-optimized for <i>S. cerevisiae</i> expression) | <p>ATGAACAGTAACAGGACACCTTCTCAGAAGGTGTTAGCTAGGCAAGAAAAAATTAAA</p> <p>GCAGTCGCTTTAGAGCTGTTTCTGACAAAGGGCTACCAAGAAACCAGCCTATCAGAT</p> <p>ATTATTAATTGTCTGGAGGTTCCATTCCAATATCTACGATGGATTCAAATCTAAAGA</p> <p>GGGGTTGTTTTTCGAAATTTAGACGATATATGCAAGAAACACTTTCATTTGATTTACT</p> <p>CTAAGACACAAGAAATTGAGAACGGTACCCTAAAGGAGATTCTAACAAGCTTCGGAC</p> <p>TGGCTTTCATTGAAATCTCAACCAGCCGGAAGCAGTCGCGTTTGGTAAAAATAATTTA</p> <p>CAGTCAAGTTTATGATAAGGACCGTCACCTTGCAAATTGGATCGAAAACAATCAGCA</p> <p>AAATTTCTCCTATAATATCTTAATGGGCTTCTTCAAACAACAGAACAACAGTTACATGA</p> <p>AAAAGAACGCTGAGAAATTAGCAGTGCTTTTCTGTACTATGTTAAAGGAACCATATCA</p> <p>TCATCTTAACGTCTTGATCAATGCACCACTAAAAACAAAAAGAGCAAAAAGGAACAC</p> <p>GTGGAGTTCGTCGTCAATGTATTCTGAACGGAATAAATCCAGTAAGGCATAA</p> |
|-------------------------------------------------------------------|--------------------------------------------------------------------------------------------------------------------------------------------------------------------------------------------------------------------------------------------------------------------------------------------------------------------------------------------------------------------------------------------------------------------------------------------------------------------------------------------------------------------------------------------------------------------------------------------------------------------------------------------------------------------------------------------------------------------------------------------|

**Oligonucleotides for *E. coli* work:**

|                      |                                            |
|----------------------|--------------------------------------------|
| 1 (insert pipe Fwd)  | TGATAGAGGACAACACTACTAGATGAACAGTAACAGGACACC |
| 2 (insert pipe Rv)   | GTAAACAGGTGAAACTGACTTATGCCTTACTGGAATTTA    |
| 3 (Vector pipe Fwd)  | TAAATTCCAGTAAGGCATAAGTCAGTTTCACCTGTTTTAC   |
| 4 (Vector pipe Rv)   | GGTGCCTGTTACTGTTTCATCTAGTAGTTGCCTCTATCA    |
| 5 ( <i>cmeO</i> Fwd) | TGTAATAAATATTACACTGTCACCGGATGTGCTTTC       |
| 6 ( <i>cmeO</i> Rv)  | TGTAATATTTATTACATACTAAAGTAGGACTGAGCTAGC    |
| 7 (-10 Fwd)          | TATAATTGTAATAAATATTACACTGTCACCGGATGT       |
| 8 (-10 Rv)           | ATTATAAGTAGGACTGAGCTAGCTGTCAATT            |
| 9 (Y203T Fwd)        | CGACAACCACTACCTTAGCACCCAGTCCGCCCTGAGCAAAG  |

|               |                                            |
|---------------|--------------------------------------------|
| 10 (Y203T Rv) | CTTTGCTCAGGGCGGACTGGGTGCTAAGGTAGTGGTTGTCCG |
|---------------|--------------------------------------------|

**Promoter(s) for *E. coli* experiments:**

|                        |                                                           |
|------------------------|-----------------------------------------------------------|
| P <sub>2</sub>         | GGTATGGAAGCTATACGTTACCAATTGACAGCTAGCTCAGTCCTACTTATAATGTAA |
| (-35) (-10) (operator) | TAAATATTACA                                               |

**Parts for *S. cerevisiae* experiments:**

|                                             |                                                                                                                                                                                                                                                                                                                                                                                                                                                                                                                                                                                                                                                                                                               |
|---------------------------------------------|---------------------------------------------------------------------------------------------------------------------------------------------------------------------------------------------------------------------------------------------------------------------------------------------------------------------------------------------------------------------------------------------------------------------------------------------------------------------------------------------------------------------------------------------------------------------------------------------------------------------------------------------------------------------------------------------------------------|
| Upstream<br>homology+linker (site<br>FgF16) | <p>ttcgtgaaacacgtgggataccggtaggtaataattacagtttccttacactactaaatacgcacagagcatgttattaatc<br/> gatatattaagtaataataacgtattgaccattcctaagactgaagcagtaccaagaatggcactttttgttatgacatagta<br/> aaagtgtcattggcagaaaacaagggtatctggatactgcaatcctcattagttgaggagagctttttaaagttttactctg<br/> ataatgcttctccagaactggcgcgactgaagccataaactgagtggtgtccctgtgtatattctacaatcgcctattga<br/> aactctgggtgataatcgatttagcgattgggttctccctctgagattctggataaatgagatgctaccctcacagtaaaaa<br/> cagtacaaaacctttgtatagttctagcaaatgaactcctcattcatggattgtatactattgttctgtgaaagattcctctgt<br/> gattttcatgggtatttaagcctttttattgaaagaattaaatattcactaggctgagatacagatacagaacgaagtgattgaa<br/> acccgaattaacggaaggaataactctgaataaaaacaacttatataataaaaaatgc</p> |
| P <sub>TDH3</sub>                           | <p>Tcgagttatcattatcaataactgccatttcaagaatacgtaaataataatagtagtgattttcctaactttatttagtcaaaaaat<br/> tagccttttaattctgctgaaccggtacatgccaaaatagggggcgggttacacagaatataacatcgtaggtgtctgggt<br/> gaacagtttattcctggcatccactaaataatggagcccgttttaagctggcatccagaaaaaaaaagaatcccagcac<br/> caaaatattgtttctcaccacatcagttcataggtcattctcttagcgcaactacagagaaacaggggcacaaacaggc<br/> aaaaaacgggcacaacctcaatggagtgatgcaacctgctggagtaaatgatgacacaaggcaattgaccacgcatg<br/> tatctatctcttttctacaccttctattaccttctgctctctgattggaaaaagctgaaaaaaaaagggtgaaaccagttccctg<br/> aaattattcccctactgactaataagtatataaagacggtaggtattgattgtaattctgtaaatctatttctaaacttctaaattct<br/> actttatagtagtcttttttagtttaaacaccaagaacttagtttcaAAAAACA</p>       |

|                                                                  |                                                                                                                                                                                                                                                                                                                                                                                                                                                                                                                                                                                                                                                                                                                                                                                                                                                              |
|------------------------------------------------------------------|--------------------------------------------------------------------------------------------------------------------------------------------------------------------------------------------------------------------------------------------------------------------------------------------------------------------------------------------------------------------------------------------------------------------------------------------------------------------------------------------------------------------------------------------------------------------------------------------------------------------------------------------------------------------------------------------------------------------------------------------------------------------------------------------------------------------------------------------------------------|
| <i>T<sub>ENO</sub></i>                                           | <p>           agtgctttaactaagaattattagctttctgcttattttcatcatagtttagaacactttatattaacgaatagttatgaatctattta<br/>           ggttataaaattgatacagttttataagtfacttttcaaagactcgtgctgtctattgcataatgcactggaaggggaaaaaaa<br/>           ggtgcacacgctggcttttctgaattgacgtttgaaaaataactacatggatgataagaaaacatggagtacagtcacttt<br/>           gagaacctcaatcagctggaacgtcttcgtaattggatactcaaaaaagatggatagcatgaatcacaagatggaagga<br/>           aatgcggggccacgaccacagtgatgcatatgggagatggagatgatacct         </p>                                                                                                                                                                                                                                                                                                                                                                  |
| Linker                                                           | <p>ccggtcttagaaaacgcataaacatacaagtgacagatg</p>                                                                                                                                                                                                                                                                                                                                                                                                                                                                                                                                                                                                                                                                                                                                                                                                               |
| <i>P<sub>CCW12</sub></i>                                         | <p>           cacccatgaaccacacggttagtccaaaaggggcagttcagattccagatgcggaattagctgtgccaccctcacctca<br/>           ctaacgctgcggtgtgcggatactcatgctattatagacgcgctgtcggaatcagcacgcgcaagaaccaaaggaa<br/>           aatcggaatgggtccagaactgcttgagtctggctattggcgtctgattccggtttgggaatcctttgccgcgccccctca<br/>           aaactccgcacaagtcccagaagcgggaaagaaataaaacgccaccccccccccccccccccccccccccccccccccc<br/>           aagcgtgggtgtagccctggattatcccgtaacagatattctcaggagtaaaaaaccggtttggaattcccatttcgc<br/>           ggccacctacgcccgtatctttgaacaactatctgcgataactcagcaattttgcatattcgtgttcagattgagataatg<br/>           gagtcttactccaacataacggcagaaagaaatgtgagaaaatttgcacctttgcctccgttcaagtataaagtcggcat<br/>           gcttgataatctttcttccatcctacattgttctaattattcttattctcctttattcttcttaacataccaagaaattaatcttctgcatc<br/>           gcttaaacactatatcaataaAAAACA         </p> |
| <i>P<sub>CCW12</sub> – cmeO</i><br>( <i>P<sub>CCW120</sub></i> ) | <p>           cacccatgaaccacacggttagtccaaaaggggcagttcagattccagatgcggaattagctgtgccaccctcacctca<br/>           ctaacgctgcggtgtgcggatactcatgctattatagacgcgctgtcggaatcagcacgcgcaagaaccaaaggaa<br/>           aatcggaatgggtccagaactgcttgagtctggctattggcgtctgattccggtttgggaatcctttgccgcgccccctca<br/>           aaactccgcacaagtcccagaagcgggaaagaaataaaacgccaccccccccccccccccccccccccccccccccccc<br/>           aagcgtgggtgtagccctggattatcccgtaacagatattctcaggagtaaaaaaccggtttggaattcccatttcgc<br/>           ggccacctacgcccgtatctttgaacaactatctgcgataactcagcaattttgcatattcgtgttcagattgagataatg<br/>           gagtcttactccaacataacggcagaaagaaatgtgagaaaatttgcacctttgcctccgttcaagtataaagtcggcat<br/>           gcTGTAAATAAATATTACATGTAATAAATATTACA<br/>           atcttctgcatcgttaaacactatatcaataaAAAACA         </p>                                               |

|                                               |                                                                                                                                                                                                                                                                                                                                                                                                                                                                                                                                                                                                                                                                                                                                                      |
|-----------------------------------------------|------------------------------------------------------------------------------------------------------------------------------------------------------------------------------------------------------------------------------------------------------------------------------------------------------------------------------------------------------------------------------------------------------------------------------------------------------------------------------------------------------------------------------------------------------------------------------------------------------------------------------------------------------------------------------------------------------------------------------------------------------|
| <i>Envy GFP</i>                               | Atgtctaaggcgaggaattgtttacaggtgtagttcctatgttggctgaactagatggagatgtcaacggcataagtttctgta<br>cggggtgaaggcgaaggtgatgctactaattggcaaaactgactctgaagttcatctgtacgaccgaaaattgccagttccatg<br>gcctacattagtaacaacattatgttacggagttcaatgctttgtagataccagatcacatgaagcagcatgacttttcaaa<br>agtgctatgccagaaggtatgtgcaggagagaactatccttcaaagatgatggtactataagacaagagcagaggtaa<br>agttgaaggcgatacattggtaataagaattgagcttaaaggcattgattttaaggaagatgggaatatcctcggacataaac<br>ttgaatacaattcaattcacataatgtttatcacagcagataaacaagaatggataaaagcgaacttaagacaaga<br>cataacgtggaagatggtagcgtccaattagccgaccattaccaaaaaacactcctatcggggacgggccagttctcctc<br>cagacaaccactacatcaaccaatctgttctatctaaagaccctaatgaaaaacgagatcacatggtctgttagagttcg<br>tgactgccgctgtataacattaggaatggacgaattgtacaataa |
| <i>T<sub>ADH1</sub></i>                       | tggacttctcggcagaggttggcaagtccaatcaagggtgctgcttctacctgcccagaaattacgaaaagatgga<br>aaagggtcaaatcgttggtagatcgttggacacttcaataagcgaatttctatgattatgattttattataaataagttat<br>aaaaaaaaataaggtatacaaaatftaaagtgactcttagttttaaacgaaaattcttattctgagtaactcttctgtaggtc<br>aggtgtcttctcaggtatagcatgaggtcgtcttattgaccacacctaccggcatgc                                                                                                                                                                                                                                                                                                                                                                                                                                |
| Downstream<br>homology+linker (site<br>FgF16) | cctcttattacatcaaaataagaaaataattataacatgcctacgcaacacttagctgcttttttaagcagcggcagatga<br>ggatttaaataacgcataaccaagaataacctaataagatgaaggtatacaggctgttctatggactgaataatactggcta<br>ccctggcgtcctaattgctgtaagaaagtaactgatcagattaatcacaactggccacaaaataccacttatctcatata<br>atctaaatcgtactaaaggtgtaggcacggaactcggacactagaggtattgctcaatgtatatttcaatggttcatctag<br>gtaagcaaggcctgaataatatacttaactctgtctgttgcgaacaattgctgagtacaataatgtggaataaaaatcaacta<br>tcatctactaactagtttactgttagtataattatcatatacgggttagaagatgacgcaaatgatgagaaatagcatctaa<br>attagtggaagctgaaacgaaggattgataatgtaataggatcaatgaatattaacataaaaatgatgataataatattata<br>gaattgtgataattgcagattccctttatggattcctaatacctcggaggagaacttctagtatatctacatacctaattatagc<br>cttaatcacaatggaatccaacaa             |

**Oligos for *S. cerevisiae* experiments:**

|                                                            |                                                                    |
|------------------------------------------------------------|--------------------------------------------------------------------|
| MN642 (cmeR Rv<br>with <i>T<sub>ENO2</sub></i> overhang)   | aataagcagaaaagactaataattcttagttaaagcactTTATGCCTTACTGGAATTTATTCCGTT |
| MN720 (cmeR Fwd<br>with <i>P<sub>TDH3</sub></i> overhang)  | tttagttttaaacaaccaagaacttagttcgaAAAACAATGAACAGTAACAGGACACCTTCTCA   |
| MN644 ( <i>T<sub>ENO2</sub></i> Fwd<br>with cmeR overhang) | CAATGTATTCTGAACGGAATAAATTCCAGTAAGGCATAAagtgtttaaactaagaattattagct  |

|                                               |                                                                              |
|-----------------------------------------------|------------------------------------------------------------------------------|
| MN863 ( $P_{TDH3}$ Rv)                        | TCGAAACTAAGTTCTTGGTGTTTTAAAC                                                 |
| Payge120 (TDH3 Fwd with linker overhang)      | aggaataactctgaataaaacaactatataataaaaatgctcgagttatcattatcaatact               |
| MN663 ( $P_{CCW12}$ cmeo Fwd)                 | TGTAATAAATATTACATGTAATAAATATTACAttcttattctcttattcttcttaacatac                |
| MN664 ( $P_{CCW12}$ cmeo Rv)                  | TGTAATATTTATTACATGTAATATTTATTACAgcatgccgactttatatacttgaacg                   |
| MN527 ( $P_{CCW12}$ Fwd with linker overhang) | Ccggcttagaaaacgcataaacatacaagtgacagatgcacccatgaaccacacgg                     |
| MN516 ( $P_{CCW12}$ Rv envy overhang)         | TAGGAACTACACCTGTAACAATTCTCGCCTTTAGACATTGTTTTtattgatatagtttaag<br>cgaatgacaga |
| Payge67 ( $T_{ENO2}$ Rv)                      | CATCTGTCCACTTGTATGTTTATGCGTTTTCTAAGACCGGaggtatcatctccatctcc                  |
| MN694 (FgF16 up Fwd)                          | ttcgtgaaacacgtgggataccggtaggtaatat                                           |
| GC2952 (FgF16 up Rv)                          | gcattttattatataagtgtttattcagagtattcctccgtaattcgggttcaa                       |
| GC2953 (FgF16 down Fwd)                       | cctcttatattacataaaataagaaaataattataacatgcctacgcaacacttagc                    |
| MN695 (FgF 16 down Rv)                        | ttgtgggattccattgtgattaaggctataatattaggtatgt                                  |
| $T_{ADH1}$ Fwd                                | CGCTGGTATAACATTAGGAATGGACGAATTGTACAAATAAtggacttctcgccagaggt                  |
| $T_{ADH1}$ Rv                                 | TGTTATAATTATTTTCTTATTTTGATGTAATATAAAGAGGgcatgccgtagag                        |
| MN966 (gRNA oligo annealing Fwd)              | TCCTCGCTGGCGCCGCTGGGCAACACCTTCGGGTGGCGAATGGGACTTTCGTAG<br>ATTCCTATATCCTAC    |
| MN967 (gRNA oligo annealing Rv)               | GTTGATAACGGACTAGCCTTATTTAACTTGCTATTTCTAGCTCTAAAACGTAGGATA<br>TAGGAATCTACG    |
| MN523 (envy Fwd)                              | aattaatcttctgtcattcgcttaaacactatatcaataaAAAACAATGTCTAAAGGCGAGGAATTG          |
| Envy Rv with adh1 overhang                    | ttgattggagacttgaccaaacctctggcgaagaagtccaTTATTTGTACAATTCGTCCATTCTCA           |
